# Supplementary material for: Leaf morpho-physiological traits of Populus sibirica and Ulmus pumila in different irrigation regimes and fertilizer types
Source: PeerJ. 2023 Sep 29;11:e16107. doi: 10.7717/peerj.16107 (PMC10544310; doi:10.7717/peerj.16107)
Supplement: Supplemental Information 2 [file peerj-11-16107-s002.xlsx]

## Sheet: LM
Lun_2021									2022
№	treatment	LA	SLA	№	treatment	LA	SLA		Ulm	treatment	LA	SLA	Pop	treatment	LA	SLA
Ulm	Cont	3.708	26.283	Pop	Cont	19.1902	25.5825			Cont	4.3662	27.4604		Cont	7.8092	25.0423
		3.782	27.0336			26.0296	27.2907				1.9922	28.8725			6.6502	22.9793
		3.292	29.0736			33.6198	29.2153				2.3844	30.1823			6.8846	21.6402
		2.6356	27.8017			19.3236	27.6739				2.9166	29.166			6.7996	21.286
		4.5984	22.2964			31.3358	24.1464				2.5244	24.2731			5.9488	25.4211
		4.2828	23.3281			31.3918	26.2704				2.5836	24.3736			5.8726	23.9385
		4.2978	23.7539			28.4956	24.3429				2.4246	25.2563			6.4716	28.8062
		4.0238	23.8292			36.3328	25.0905				2.372	25.5054			8.108	28.8633
		5.404	21.4385		2L	35.8226	27.3198				2.046	24.9512			10.4198	23.9574
		3.9832	21.0184			31.0308	26.0064				2.5912	23.9926			6.6014	23.4142
		4.4938	21.4378			30.001	26.5615				2.082	25.3902			7.0676	22.3573
		4.0298	21.6353			20.0498	25.4798				2.3366	25.1247			5.2186	22.2618
	2L	6.298	21.1676			33.5246	23.7527			2L	3.5622	23.9074		2L	7.8286	26.6053
		7.1596	22.7246			14.7754	24.5288				2.9202	22.8141			6.6076	25.1278
		7.131	23.4557			14.8824	16.5202				3.7262	25.177			6.9712	26.5499
		6.1088	22.9576			30.4924	27.4405				2.6722	24.7426			5.611	26.9268
		6.8118	18.995			20.1198	26.7907				2.1292	21.0812			8.4746	25.7924
		5.4158	14.0277			25.5806	27.7357				2.1804	21.5881			8.4946	22.8196
		7.3368	25.1899			27.2812	25.8602				2.2292	21.4346			12.6554	29.2929
		6.8338	18.9944			34.7284	26.8216				2	20.6186			8.9054	25.2528
		7.0872	17.3421		4L	25.45	26.4339				5.8004	21.4037			12.4998	27.2868
		6.6848	18.475			23.9046	30.7478				5.5814	20.7487			11.4866	27.5531
		7.3592	17.1041			37.9044	26.3842				3.855	21.2983			13.819	29.3235
		8.1514	17.3464			58.062	27.6575				1.4584	23.5226			8.2774	28.5447
	4L	4.1946	19.29			32.9252	32.8038			4L	1.8998	9.84352		4L	8.9834	29.034
		3.893	20.2729			27.902	31.1841				1.649	7.96618			8.022	25.547
		4.4048	18.4371			33.6198	27.2174				1.7064	7.97383			7.1946	26.008
		3.6654	20.3905			18.432	35.8788				1.898	9.49			5.2824	27.8917
		6.2766	16.7331			28.1276	24.249				3.8416	49.2513			10.8456	25.8956
		8.2802	17.0182			33.3028	23.6556				4.1328	56.6137			9.1162	24.0743
		7.1406	16.7262			34.5754	24.112				4.318	59.9722			10.0738	25.2983
		5.3842	17.121			38.1334	25.0934				4.0238	50.2975			8.1796	24.4862
		7.3082	17.8676		8L	28.9178	25.5652				3.0514	18.4933			8.2236	25.1233
		5.7912	18.3481			26.733	29.2142				3.0726	22.4277			9.8934	26.0031
		7.0472	17.6608			30.2566	25.5108				2.1572	27.3063			9.777	28.755
		4.096	18.7211			45.6934	26.6226				2.0126	20.3293			8.5416	21.4635
	8L	4.5758	21.4645			15.3694	27.5932			8L	3.7272	21.6698		8L	7.8356	23.7205
		3.6614	22.4612			20.6468	27.0052				2.7232	23.68			8.4474	23.7573
		3.6552	22.371			15.819	28.9566				3.0618	21.87			7.3648	23.1031
		4.6278	21.8385			17.051	29.1989				2.7966	22.7366			7.9804	25.8073
		2.0434	22.4451			15.8662	22.0339				1.9114	18.5573			9.9444	28.8846
		2.246	22.0261			16.9448	19.2749				2.0392	18.3712			9.51	30.433
		1.9212	21.2264			25.8556	27.9804				1.8246	18.246			8.6618	27.1606
		2.5836	22.739			30.8836	28.2703				2.0186	18.6907			7.7764	30.0039
		2.8298	21.2799		Cont-NPK	16.2624	28.492				2.6322	17.4318			7.0242	27.4372
		2.6198	21.7249			16.3982	28.8548				1.704	21.5696			5.5918	26.9031
		3.1804	21.603			14.3614	28.0469				2.0522	20.3188			6.222	27.1976
		2.3938	21.5619			16.1236	27.4683				2.0948	18.5381			5.3544	27.4345
	Cont-NPK	4.6594	20.4953		Cont-Comp	12.7512	26.1966			Cont-NPK	2.5446	26.5062		2L-NPK	11.7036	33.9915
		3.9482	19.6496			9.3124	25.774				2.63	26.3			10.2882	30.8834
		3.885	19.9118			12.963	25.1216				1.9836	27.1726			9.9626	30.7345
		2.6998	18.9035			16.0416	25.8227				1.4578	29.751			11.136	32.5862
		1.6504	22.1085			12.4982	25.1043				1.3514	24.5709			8.0804	25.0314
		0.7406	22.1538			12.5062	20.8513				1.0478	25.5561			7.6118	23.2805
		1.1148	19.6822			19.8476	25.0959				1.0674	28.0895			6.8578	24.3288
		1.223	22.0997			23.8034	24.5895				1.1382	27.1			5.156	25.0608
		2.6874	22.4737		2L-NPK	21.1284	26.0986				1.9474	25.6237			11.7692	34.2436
		3.9196	21.5327			30.4536	26.7505				1.7096	25.1412			8.716	29.1778
		3.7504	22.3305			32.3668	25.7566				1.6222	25.3469			7.1088	27.2451
		2.553	22.1039			34.2644	25.6803				1.9204	25.6053			5.4006	27.2909
	Cont-Comp	5.6336	24.9905			22.4072	27.391			2L-NPK	4.9628	26.9717		4L-NPK	7.9246	23.8098
		5.8988	23.158			18.9268	25.6478				4.9074	24.9107			6.5778	26.2786
		7.3714	21.116			15.2342	27.3613				5.416	22.9492			6.9252	23.8037
		7.5098	22.076			25.3094	30.5765				6.145	20.7601			8.2358	25.1752
		3.9696	20.4429			17.4348	24.1299				2.6748	24.5394			7.172	25.1473
		5.1184	22.9576			33.4558	25.723				3.0124	24.4911			6.262	24.4352
		5.0332	21.0286			22.3168	22.874				2.8868	22.9111			7.6624	22.8245
		3.5634	20.437			15.552	23.8967				2.4572	23.6269			7.8154	27.2342
		5.9872	20.4999		2L-Comp	35.3066	24.7337				5.0758	23.7187			7.597	27.4488
		5.1528	23.2454			27.8646	24.4413				3.7876	26.3028			7.5472	27.2472
		6.2112	21.4468			36.8572	25.6509				3.674	24.8243			5.494	23.055
		7.2738	22.5335			57.2428	21.9409				4.0654	24.0556			5.7466	23.9173
	2L-NPK	6.279	20.5303			17.0282	24.6414			4L-NPK	2.0358	18.6771		8L-NPK	9.829	25.6411
		6.289	19.5742			26.5952	24.7817				2.2332	19.9393			9.6034	27.287
		4.462	20.8193			20.6764	23.3832				2.1404	17.8367			8.8268	24.7603
		5.241	21.3318			25.3788	24.6667				2.5088	18.4471			9.5782	24.7665
		5.5896	22.1555			15.4426	25.6517				5.4054	19.0331			11.6156	24.2512
		4.563	22.6609			26.7578	26.7412				4.7598	19.1157			11.614	26.1689
		5.1918	21.8814			32.0484	24.9894				5.3686	18.0154			9.4064	24.6376
		4.0472	21.3945			39.518	25.0155				4.4972	18.6606			6.9588	24.0781
		4.7794	20.2758		4L-NPK	30.48	26.1075				3.1414	20.6671			5.862	26.0939
		5.568	19.7657			35.063	25.8067				3.2474	20.4239			8.8874	26.8088
		5.8956	20.5909			33.1946	26.8341				3.2028	20.9333			8.148	26.8893
		4.8554	21.7819			31.6596	25.7642				3.3416	20.6272			10.9974	25.4605
	2L-Comp	4.4652	19.0219			18.2872	27.5157			8L-NPK	3.8854	18.6798		2L-Comp	9.48	29.6797
		3.8508	20.8919			17.0338	25.0412				3.1994	18.6012			7.3008	26.694
		4.1076	20.7423			34.3898	27.7065				3.932	18.2037			8.8268	27.4858
		3.8198	20.6912			24.5692	28.953				3.307	18.3722			12.5296	29.6966
		3.286	21.2137			22.2614	25.2331				2.9166	15.9377			7.3522	24.5335
		2.7604	22.7606			29.223	24.597				3.6292	15.2487			8.105	24.189
		2.6462	22.2071			36.0502	25.0653				3.569	15.5174			7.939	24.3782
		2.7332	21.7542			21.5692	25.4423				3.3064	16.1288			6.7034	18.4901
		4.13	21.9763		4L-Comp	22.575	22.8328				2.6228	15.8958			7.1866	22.9648
		3.8316	23.0444			23.0996	22.1364				2.7256	16.8247			9.0844	27.053
		4.5942	21.5145			28.5076	23.0778				2.4242	17.4403			7.345	24.8899
		3.1648	21.8579			27.67	23.0726				2.3206	17.3179			6.2648	24.1753
	4L-NPK	3.9286	19.7675			13.362	24.7325			Cont-COMP	3.3078	23.9696		4L-Comp	11.3232	24.6537
		3.5674	19.9653			17.5418	26.5801				2.2142	16.4015			9.8988	22.9607
		4.119	19.3181			19.1008	26.2129				2.615	25.8911			9.4296	23.8827
		5.2154	19.2386			35.368	23.6618				2.2372	20.9084			10.4178	24.6663
		8.6658	18.3159			42.7234	23.464				1.818	23.9211			10.8278	24.002
		8.7248	17.793			25.8466	24.1363				2.2836	24.2936			11.4238	25.3097
		10.3364	18.5546			31.7316	22.5543				2.0044	22.5213			11.8014	22.1777
		7.6472	18.1609			44.6858	24.5769				1.6236	25.3688			10.922	23.0597
		4.9998	20.5078		8L-NPK	15.2526	24.1274				3.2896	22.5315			10.5254	22.3076
		4.6844	20.8048			24.1046	23.3599				3.3122	36.8022			11.681	25.128
		6.2852	18.4349			11.8292	26.4944				2.5532	23.6407			10.7866	27.7369
		5.3754	18.9395			12.9812	23.2521				2.6338	28.9429			10.6608	25.6633
	4L-Comp	4.0426	16.1931			13.6338	24.2258			2L-Comp	3.0342	21.6729		8L-Comp	6.7838	23.1949
		3.883	16.489			11.769	26.9937				2.6386	19.1203			7.85	28.0037
		4.2248	15.6538			9.4572	27.6381				2.3212	24.6936			7.4776	26.4226
		3.7386	15.9408			7.7078	27.0753				2.7104	22.0358			7.9528	25.789
		2.4736	14.2776			11.0086	29.5129				2.2136	22.8206			10.989	23.0064
		2.327	16.5153			13.7814	26.5635				2.0564	23.3682			9.106	23.5687
		2.8666	15.359			18.3446	26.7472				2.0088	23.0897			11.6454	24.3114
		2.2812	14.624			29.1356	28.5825				1.9598	22.0202			7.831	23.9825
		1.7914	12.9652		8L-Comp	31.7976	22.9119				3.198	25.1811			9.7488	25.8802
		1.706	13.7792			49.5358	24.86				2.5738	24.2811			9.1442	25.208
		1.6158	13.9125			14.4536	25.4954				2.537	25.8878			9.1484	25.3847
		2.3066	12.9315			11.999	27.2686				2.7974	25.9019			8.321	25.6441
	8L-NPK	6.4258	18.715			16.3088	26.1694			4L-Comp	2.9312	17.0419
		6.6014	21.3811			15.3486	25.8498				2.96	16.5363
		5.4406	21.5486			18.256	24.4643				2.7272	16.8346
		7.8328	20.3286			33.5748	25.1483				3.2364	17.6852
		3.7816	15.1331			23.7056	25.2703				2.2092	16.0087
		3.4828	15.5101			18.0704	25.2228				1.9176	17.5927
		3.7916	15.887			25.8572	43.3533				2.0644	16.2551
		4.5436	15.3562			15.9574	17.4853				1.7422	16.9146
		6.4222	15.5201								4.095	15.3947
		5.51	17.6744								3.4004	15.9643
		6.1586	15.0721								3.3982	16.2593
		6.8982	16.5369								3.7666	15.0064
	8L-Comp	9.6012	20.7908							8L-Comp	3.509	18.8656
		5.2562	21.1101								3.705	22.0536
		4.8636	20.8095								3.9702	12.6038
		4.6854	21.5381								4.1266	23.9919
		5.6286	20.3831								3.0832	18.2438
		5.4252	21.5363								3.2652	19.4357
		7.4662	20.3123								2.7802	15.7073
		7.0554	21.443								2.7728	14.3668
		4.6146	19.295								3.936	23.8545
		4.543	20.1589								3.595	21.9207
		3.5352	18.9301								4.5198	31.171
		4.2048	20.2348								3.7306	24.0684

## Sheet: Chlorophyll
Mon	species	treatment	sample
1	1	1	1	23.5
1	1	1	2	24.8
1	1	1	3	15.2
1	1	2	1	24.6
1	1	2	2	20
1	1	2	3	15.5
1	1	3	1	11.3
1	1	3	2	34
1	1	3	3	33.7
1	1	4	1	16.3
1	1	4	2	11.7
1	1	4	3	24.9
1	1	5	1	11
1	1	5	2	20
1	1	5	3	47.2
1	1	6	1	16.2
1	1	6	2	14.5		Month	2021	1
1	1	6	3	22.1			2022	2
1	1	7	1	29.6
1	1	7	2	16.7		Species	U.pumila	1
1	1	7	3	13			P.sibirica	2
1	1	8	1	17.6
1	1	8	2	8.9
1	1	8	3	13.9
1	1	9	1	31.9
1	1	9	2	20.1		Treatment	Control	1
1	1	9	3	25.2			2l/h	2
1	1	10	1	20.5			4l/h	3
1	1	10	2	15.2			8l/h	4
1	1	10	3	7.7			Cont-NPK	5
1	1	11	1	27.8			2L-NPK	6
1	1	11	2	15.2			4L-NPK	7
1	1	11	3	15.7			8L-NPK	8
1	1	12	1	21.5			Cont-COMP	9
1	1	12	2	23.6			2L-COMP	10
1	1	12	3	19.9			4L-COMP	11
1	2	1	1	-			8L-COMP	12
1	2	1	2	34.5
1	2	1	3	25.2
1	2	2	1	35.3
1	2	2	2	28.8
1	2	2	3	30.3
1	2	3	1	31.2
1	2	3	2	34.7
1	2	3	3	32.3
1	2	4	1	29
1	2	4	2	25.3
1	2	4	3	27.2
1	2	5	-	-
1	2	6	1	33
1	2	6	2	20.6
1	2	6	3	32
1	2	7	1	25.3
1	2	7	2	28.5
1	2	7	3	26.7
1	2	8	1	21
1	2	8	2	25.2
1	2	8	3	25.1
1	2	9	-	-
1	2	10	1	24.7
1	2	10	2	23.9
1	2	10	3	28.6
1	2	11	1	28.3
1	2	11	2	27.6
1	2	11	3	26.5
1	2	12	1	11.1
1	2	12	2	24.5
1	2	12	3	25.1
2	1	1	1	14.4
2	1	1	2	17.2
2	1	1	3	21.7
2	1	2	1	32.7
2	1	2	2	26.1
2	1	2	3	19.6
2	1	3	1	26.2
2	1	3	2	8.9
2	1	3	3	2.3
2	1	4	1	18.8
2	1	4	2	6.8
2	1	4	3	2.1
2	1	5	1	1.7
2	1	5	2	1.7
2	1	5	3	1.9
2	1	6	1	2.5
2	1	6	2	4.1
2	1	6	3	17.7
2	1	7	1	3.9
2	1	7	2	23.5
2	1	7	3	20.2
2	1	8	1	23.4
2	1	8	2	8.4
2	1	8	3	2.2
2	1	9	1	1.6
2	1	9	2	22.1
2	1	9	3	5.9
2	1	10	1	4
2	1	10	2	11.1
2	1	10	3	2.7
2	1	11	1	18.7
2	1	11	2	20
2	1	11	3	3
2	1	12	1	4.5
2	1	12	2	22.7
2	1	12	3	17.3
2	2	1	1	17.6
2	2	1	2	23.7
2	2	1	3	28.4
2	2	2	1	26.3
2	2	2	2	30.8
2	2	2	3	22.7
2	2	3	1	28.7
2	2	3	2	29.9
2	2	3	3	33
2	2	4	1	27.1
2	2	4	2	34.4
2	2	4	3	32.1
2	2	5	-	-
2	2	6	1	30
2	2	6	2	31
2	2	6	3	26.9
2	2	7	1	16
2	2	7	2	11.9
2	2	7	3	32.2
2	2	8	1	25
2	2	8	2	33.2
2	2	8	3	28.4
2	2	9	-	-
2	2	10	1	29.4
2	2	10	2	17.4
2	2	10	3	37.3
2	2	11	1	13.8
2	2	11	2	27.5
2	2	11	3	26.5
2	2	12	1	30
2	2	12	2	24.3
2	2	12	3	21.9

## Sheet: SC-1
Month	Species	Treatment	Sample	Resistance
1	1	1	1	12.1507
1	1	1	2	14.1546
1	1	1	3	10.0604
1	1	1	4	5.53097
1	1	1	5	3.4118
1	1	1	6	4.56413			Month	2021	1
1	1	2	1	5.91366				2022	2
1	1	2	2	6.52316
1	1	2	3	5.10204			Species	U.pumila	1
1	1	2	4	3.80518				P.sibirica	2
1	1	2	5	2.38493
1	1	2	6	5.04541
1	1	2	7	12.4069
1	1	2	8	3.00661
1	1	2	9	3.61272			Treatment	Control	1
1	1	3	1	11.655				2l/h	2
1	1	3	2	7.32064				4l/h	3
1	1	3	3	9.38086				8l/h	4
1	1	3	4	4.34783				Cont-NPK	5
1	1	3	5	5.53403				2L-NPK	6
1	1	3	6	7.8064				4L-NPK	7
1	1	3	7	3.61402				8L-NPK	8
1	1	3	8	3.41763				Cont-COMP	9
1	1	3	9	3.59324				2L-COMP	10
1	1	4	1	4.36872				4L-COMP	11
1	1	4	2	4.04367				8L-COMP	12
1	1	4	3	4.66636
1	1	4	4	9.92063
1	1	4	5	8.07754
1	1	4	6	6.98324
1	1	4	7	4.32526
1	1	4	8	6.32911
1	1	4	9	4.914
1	1	5	1	-
1	1	5	2	-
1	1	5	3	-
1	1	6	4	-
1	1	6	5	-
1	1	6	6	-
1	1	6	7	-
1	1	6	8	-
1	1	6	9	-
1	1	7	1	3.8625
1	1	7	2	3.77929
1	1	7	3	2.98686
1	1	7	4	13.3156
1	1	7	5	10.1215
1	1	7	6	4.66418
1	1	7	7	4.02253
1	1	7	8	4.76417
1	1	7	9	4.09165
1	1	8	1	8.38223
1	1	8	2	6.66667
1	1	8	3	6.15006
1	1	8	4	4.29738
1	1	8	5	3.55999
1	1	8	6	3.56888
1	1	8	7	7.72201
1	1	8	8	5.23013
1	1	8	9	5.68182
1	1	9	1	2.96121
1	1	9	2	3.04971
1	1	9	3	2.68817
1	1	9	4	5.12558
1	1	9	5	6.66667
1	1	9	6	4.31406
1	1	9	7	2.53485
1	1	9	8	3.17864
1	1	9	9	3.38524
1	1	10	1	2.76319
1	1	10	2	3.75657
1	1	10	3	2.4728
1	1	10	4	2.8401
1	1	10	5	3.427
1	1	10	6	2.79096
1	1	10	7	4.3956
1	1	10	8	3.73552
1	1	10	9	4.4843
1	1	11	1	4.43656
1	1	11	2	4.57038
1	1	11	3	14.4092
1	1	11	4	7.73395
1	1	11	5	6.2461
1	1	11	6	6.28931
1	1	11	7	4.87329
1	1	11	8	6.64894
1	1	11	9	4.79386
1	1	12	1	12.3001
1	1	12	2	5.75374
1	1	12	3	2.78242
1	1	12	4	3.23102
1	1	12	5	3.48675
1	1	12	6	3.6062
1	1	12	7	4.41891
1	1	12	8	4.04204
1	1	12	9	8.97666
1	2	1	1	10.7296
1	2	1	2	9.19963
1	2	1	3	9.94036
1	2	1	4	2.56608
1	2	1	5	3.63901
1	2	1	6	3.96983
1	2	1	7	6.93963
1	2	1	8	5.28821
1	2	1	9	6.10874
1	2	2	1	3.62188
1	2	2	2	4.62321
1	2	2	3	4.9505
1	2	2	4	2.27118
1	2	2	5	3.02663
1	2	2	6	3.7679
1	2	2	7	3.40716
1	2	2	8	3.40368
1	2	2	9	3.2352
1	2	3	1	3.22477
1	2	3	2	2.81294
1	2	3	3	3.09215
1	2	3	4	2.61097
1	2	3	5	2.60417
1	2	3	6	3.81243
1	2	3	7	2.40558
1	2	3	8	2.936
1	2	3	9	6.38978
1	2	4	1	4.02414
1	2	4	2	5.17063
1	2	4	3	4.19287
1	2	4	4	2.84576
1	2	4	5	10.2459
1	2	4	6	6.03136
1	2	4	7	6.72043
1	2	4	8	4.79386
1	2	4	9	5.17331
1	2	5	1	5.70776
1	2	5	2	6.67111
1	2	5	3	5.99161
1	2	5	4	11.8765
1	2	5	5	4.29923
1	2	5	6	17.5747
1	2	5	7	6.03865
1	2	5	8	4.00962
1	2	5	9	6.36537
1	2	6	1	7.68049
1	2	6	2	6.52316
1	2	6	3	8.61326
1	2	6	4	7.42942
1	2	6	5	6.67557
1	2	6	6	11.0865
1	2	6	7	11.976
1	2	6	8	9.0009
1	2	6	9	10.3627
1	2	7	1	5.64334
1	2	7	2	4.62107
1	2	7	3	4.39367
1	2	7	4	5.93824
1	2	7	5	3.8835
1	2	7	6	6.20347
1	2	7	7	4.90918
1	2	7	8	2.67666
1	2	7	9	5.12295
1	2	8	1	4.24628
1	2	8	2	7.84929
1	2	8	3	6.13874
1	2	8	4	4.363
1	2	8	5	4.37828
1	2	8	6	2.98329
1	2	8	7	4.02414
1	2	8	8	3.6914
1	2	8	9	9.19118
1	2	9	1	8.96057
1	2	9	2	7.66871
1	2	9	3	8.3612
1	2	9	4	2.61301
1	2	9	5	3.25309
1	2	9	6	4.23729
1	2	9	7	3.09789
1	2	9	8	3.63108
1	2	9	9	4.90918
1	2	10	1	2.31
1	2	10	2	2.55689
1	2	10	3	3.51865
1	2	10	4	11.7925
1	2	10	5	5.80383
1	2	10	6	5.74383
1	2	10	7	4.44444
1	2	10	8	2.33427
1	2	10	9	11.5875
1	2	11	1	2.36686
1	2	11	2	2.99312
1	2	11	3	2.54972
1	2	11	4	1.98295
1	2	11	5	2.17581
1	2	11	6	2.78396
1	2	11	7	2.55689
1	2	11	8	3.66569
1	2	11	9	3.70782
1	2	12	1	3.47343
1	2	12	2	3.28947
1	2	12	3	4.55166
1	2	12	4	4.15282
1	2	12	5	3.33667
1	2	12	6	3.87447
1	2	12	7	2.7972
1	2	12	8	2.61849
1	2	12	9	3.22477
2	1	1	1	9.29368
2	1	1	2	5.48546
2	1	1	3	6.67557
2	1	1	4	4.47828
2	1	1	5	4.53515
2	1	1	6	4.19992
2	1	1	7	4.34972
2	1	1	8	5.32481
2	1	1	9	5.08906
2	1	2	1	3.3389
2	1	2	2	5.20021
2	1	2	3	3.56761
2	1	2	4	3.69959
2	1	2	5	4.51264
2	1	2	6	4.40917
2	1	2	7	5.52181
2	1	2	8	4.39754
2	1	2	9	6.68896
2	1	3	1	4.6729
2	1	3	2	5.5371
2	1	3	3	4.80307
2	1	3	4	4.67946
2	1	3	5	4.84027
2	1	3	6	4.22833
2	1	3	7	4.85673
2	1	3	8	4.11523
2	1	3	9	3.81825
2	1	4	1	4.73485
2	1	4	2	4.00802
2	1	4	3	4.57666
2	1	4	4	3.4188
2	1	4	5	5.18135
2	1	4	6	3.69276
2	1	4	7	5.47645
2	1	4	8	3.68596
2	1	4	9	3.80228
2	1	5	1	-
2	1	5	2	-
2	1	5	3	-
2	1	6	4	-
2	1	6	5	-
2	1	6	6	-
2	1	6	7	-
2	1	6	8	-
2	1	6	9	-
2	1	7	1	23.2558
2	1	7	2	23.8663
2	1	7	3	21.645
2	1	7	4	5.70125
2	1	7	5	9.19118
2	1	7	6	17.301
2	1	7	7	7.95545
2	1	7	8	6.40205
2	1	7	9	5.05561
2	1	8	1	7.66284
2	1	8	2	5.33903
2	1	8	3	8.26446
2	1	8	4	10.4932
2	1	8	5	6.69792
2	1	8	6	9.68992
2	1	8	7	6.68896
2	1	8	8	7.59301
2	1	8	9	8.1103
2	1	9	1	23.4192
2	1	9	2	30.6748
2	1	9	3	13.2626
2	1	9	4	4.47227
2	1	9	5	4.30663
2	1	9	6	3.66569
2	1	9	7	5.52792
2	1	9	8	4.60829
2	1	9	9	3.68732
2	1	10	1	5.24934
2	1	10	2	6.25391
2	1	10	3	4.59137
2	1	10	4	6.28536
2	1	10	5	5.50964
2	1	10	6	6.03136
2	1	10	7	4.32526
2	1	10	8	3.8625
2	1	10	9	4.75285
2	1	11	1	5.22193
2	1	11	2	4.79157
2	1	11	3	4.65766
2	1	11	4	6.52742
2	1	11	5	8.6881
2	1	11	6	10.3306
2	1	11	7	9.99001
2	1	11	8	13.8696
2	1	11	9	6.27353
2	1	12	1	15.949
2	1	12	2	5.84795
2	1	12	3	7.05219
2	1	12	4	6.33312
2	1	12	5	11.8483
2	1	12	6	7.19424
2	1	12	7	16.6667
2	1	12	8	18.315
2	1	12	9	8.4246
2	2	1	1	3.70782
2	2	1	2	3.20513
2	2	1	3	3.84911
2	2	1	4	6.61813
2	2	1	5	7.59878
2	2	1	6	6.64894
2	2	1	7	5.54631
2	2	1	8	7.22022
2	2	1	9	6.49351
2	2	2	1	4.51875
2	2	2	2	4.3611
2	2	2	3	4.07166
2	2	2	4	3.57015
2	2	2	5	3.72995
2	2	2	6	3.95257
2	2	2	7	4.03388
2	2	2	8	4.3611
2	2	2	9	4.76872
2	2	3	1	4.1684
2	2	3	2	4.18936
2	2	3	3	7.02247
2	2	3	4	3.26584
2	2	3	5	3.31345
2	2	3	6	3.25309
2	2	3	7	3.32668
2	2	3	8	3.18776
2	2	3	9	3.9984
2	2	4	1	3.75657
2	2	4	2	3.68053
2	2	4	3	3.42114
2	2	4	4	3.18471
2	2	4	5	3.27332
2	2	4	6	4.26803
2	2	4	7	2.83527
2	2	4	8	3.80807
2	2	4	9	3.0656
2	2	5	1	14.1844
2	2	5	2	9.04977
2	2	5	3	8.21693
2	2	5	4	18.797
2	2	5	5	21.4133
2	2	5	6	9.95025
2	2	5	7	11.6009
2	2	5	8	14.771
2	2	5	9	13.5501
2	2	6	1	9.58773
2	2	6	2	12.5945
2	2	6	3	11.236
2	2	6	4	6.8918
2	2	6	5	9.3633
2	2	6	6	9.77517
2	2	6	7	5.11247
2	2	6	8	5.91716
2	2	6	9	6.65779
2	2	7	1	3.96511
2	2	7	2	4.04204
2	2	7	3	4.63177
2	2	7	4	5.07357
2	2	7	5	5.7971
2	2	7	6	6.10874
2	2	7	7	4.73485
2	2	7	8	4.38596
2	2	7	9	5.68182
2	2	8	1	4.69484
2	2	8	2	9.40734
2	2	8	3	4.31965
2	2	8	4	4.23549
2	2	8	5	4.03551
2	2	8	6	4.86618
2	2	8	7	4.01929
2	2	8	8	3.72162
2	2	8	9	4.09333
2	2	9	1	4.30108
2	2	9	2	4.34594
2	2	9	3	4.63392
2	2	9	4	4.51264
2	2	9	5	3.4965
2	2	9	6	3.87898
2	2	9	7	4.33651
2	2	9	8	3.8956
2	2	9	9	7.01262
2	2	10	1	3.33333
2	2	10	2	3.65097
2	2	10	3	3.29598
2	2	10	4	3.2175
2	2	10	5	2.9967
2	2	10	6	3.78501
2	2	10	7	3.38409
2	2	10	8	3.2041
2	2	10	9	3.36134
2	2	11	1	3.57015
2	2	11	2	3.885
2	2	11	3	3.69686
2	2	11	4	3.98406
2	2	11	5	3.59842
2	2	11	6	3.6846
2	2	11	7	3.92003
2	2	11	8	4.62963
2	2	11	9	4.23012
2	2	12	1	4.50857
2	2	12	2	4.1806
2	2	12	3	6.34518
2	2	12	4	4.58505
2	2	12	5	3.49773
2	2	12	6	3.86698
2	2	12	7	3.85356
2	2	12	8	9.67118
2	2	12	9	3.8625

## Sheet: CFlou
Month	Species	Treatment	Sample	Fo	Fm	Fv	Fv/Fm	ABS/RC	DIo/RC	TRo/RC	ETo/RC	REo/RC	PI abs
1	1	1	1	554	2632	2078	0.79	1.9892	0.4187	1.5705	0.8502	0.503	2.226
1	1	1	2	558	2425	1867	0.77	2.0422	0.4699	1.5723	0.8438	0.526	1.898
1	1	1	3	617	2422	1805	0.745	2.044	0.5207	1.5233	0.5815	0.403	0.884		Species	U.pumila	1
1	1	1	4	597	2511	1914	0.762	2.0339	0.4836	1.5503	0.7266	0.529	1.39			P.sibirica	2
1	1	1	5	564	2595	2031	0.783	2.0541	0.4464	1.6077	0.8921	0.54	2.186
1	1	1	6	507	2397	1890	0.788	1.7421	0.3685	1.3736	0.7246	0.448	2.389
1	1	1	7	538	1988	1450	0.729	2.322	0.6284	1.6936	0.8982	0.536	1.311
1	1	2	1	530	2732	2202	0.806	1.6975	0.3293	1.3682	0.6188	0.337	2.021
1	1	2	2	480	2388	1908	0.799	1.7222	0.3462	1.3761	0.8135	0.485	3.338		Month	2021	1
1	1	2	3	494	2344	1850	0.789	1.7838	0.3759	1.4079	0.7953	0.481	2.725			2022	2
1	1	2	4	492	2939	2447	0.833	1.7934	0.3002	1.4931	0.7371	0.37	2.704
1	1	2	5	487	2691	2204	0.819	1.8547	0.3356	1.519	0.8188	0.392	2.853		Treatment	Control	1
1	1	2	6	466	2918	2452	0.84	1.6087	0.2569	1.3518	0.7536	0.377	4.121			2l/h	2
1	1	2	7	469	2279	1810	0.794	1.6788	0.3455	1.3333	0.7293	0.432	2.775			4l/h	3
1	1	2	8	461	2292	1831	0.799	1.7048	0.3429	1.3619	0.7884	0.466	3.203			8l/h	4
1	1	2	9	476	2478	2002	0.808	1.7073	0.3279	1.3793	0.7999	0.47	3.401			Cont-NPK	5
1	1	3	1	553	2362	1809	0.766	1.9183	0.4491	1.4692	0.6603	0.459	1.392			Cont-COMP	6
1	1	3	2	556	2185	1629	0.746	2.1685	0.5518	1.6167	0.6898	0.451	1.005			2L-NPK	7
1	1	3	3	-	-	-	-	-	-	-	-	-	-			2L-COMP	8
1	1	3	4	-	-	-	-	-	-	-	-	-	-			4L-NPK	9
1	1	3	5	535	2488	1953	0.785	1.8526	0.3984	1.4542	0.7766	0.436	2.258			4L-COMP	10
1	1	3	6	531	2712	2181	0.804	1.83	0.3583	1.4717	0.6296	0.327	1.678			8L-NPK	11
1	1	3	7	501	2669	2168	0.812	1.7274	0.3242	1.4031	0.8219	0.48	3.543			8L-COMP	12
1	1	3	8	534	2458	1924	0.783	1.8208	0.3956	1.4252	0.6889	0.462	1.851
1	1	3	9	547	2349	1802	0.767	1.952	0.4546	1.4975	0.7853	0.501	1.861
1	1	4	1	550	2217	1667	0.752	2.0566	0.5102	1.5464	0.6725	0.404	1.134
1	1	4	2	523	2253	1730	0.768	2.1266	0.4936	1.6329	0.8872	0.554	1.851
1	1	4	3	510	2621	2111	0.805	1.9959	0.3884	1.6075	0.878	0.42	2.496
1	1	4	4	524	2413	1889	0.783	2.1602	0.4691	1.6911	0.8371	0.379	1.636
1	1	4	5	549	2169	1620	0.747	2.2179	0.5614	1.6565	0.815	0.506	1.288
1	1	4	6	504	2834	2330	0.822	1.8955	0.3371	1.5584	0.7859	0.384	2.481
1	1	4	7	489	2126	1637	0.77	1.8293	0.4207	1.4085	0.7141	0.446	1.882
1	1	4	8	564	2311	1747	0.756	1.9341	0.472	1.4621	0.7122	0.485	1.521
1	1	4	9	-	-	-	-	-	-	-	-	-	-
1	1	5	1	577	2430	1853	0.763	1.9484	0.4626	1.4857	0.7176	0.427	1.54
1	1	5	2	590	2303	1713	0.744	2.0812	0.5332	1.548	0.7229	0.447	1.222
1	1	5	3	563	2566	2003	0.781	1.9943	0.4376	1.5567	0.8145	0.434	1.958
1	1	5	4	531	2187	1656	0.757	2.152	0.5225	1.6295	0.8787	0.527	1.696
1	1	5	5	642	2126	1484	0.698	2.1852	0.6599	1.5253	0.665	0.494	0.818
1	1	5	6	577	2111	1534	0.727	2.2514	0.6154	1.636	0.7668	0.517	1.042
1	1	5	7	529	2772	2243	0.809	1.9378	0.3698	1.568	0.8948	0.524	2.908
1	1	5	8	578	2417	1839	0.761	2.0058	0.4797	1.5261	0.7684	0.505	1.609
1	1	5	9	560	2437	1877	0.77	1.9735	0.4535	1.52	0.8114	0.508	1.945
1	1	6	1	649	2287	1638	0.716	2.0626	0.5853	1.4773	0.5168	0.487	0.658
1	1	6	2	629	2254	1625	0.721	2.0329	0.5673	1.4656	0.561	0.398	0.788
1	1	6	3	607	2131	1524	0.715	2.0843	0.5937	1.4906	0.6573	0.439	0.95
1	1	6	4	672	2308	1636	0.709	2.2782	0.6633	1.6149	0.5982	0.627	0.629
1	1	6	5	696	2205	1509	0.684	2.2387	0.7066	1.5321	0.4762	0.558	0.437
1	1	6	6	-	-	-	-	-	-	-	-	-	-
1	1	6	7	563	2290	1727	0.754	1.831	0.4502	1.3809	0.5509	0.481	1.112
1	1	6	8	694	2119	1425	0.672	2.3549	0.7713	1.5836	0.379	0.5	0.274
1	1	6	9	462	2275	1813	0.797	1.7745	0.3604	1.4141	0.7706	0.484	2.648
1	1	7	1	509	2378	1869	0.786	1.9714	0.422	1.5494	0.8895	0.497	2.511
1	1	7	2	533	2349	1816	0.773	1.8591	0.4218	1.4373	0.7875	0.506	2.221
1	1	7	3	499	2248	1749	0.778	1.9426	0.4312	1.5114	0.8806	0.499	2.519
1	1	7	4	689	2229	1540	0.691	2.1682	0.6702	1.498	0.5369	0.428	0.576
1	1	7	5	637	2438	1801	0.739	2.0475	0.535	1.5125	0.5501	0.44	0.789
1	1	7	6	638	2143	1505	0.702	2.1494	0.6399	1.5095	0.4885	0.436	0.525
1	1	7	7	440	2593	2153	0.83	1.7404	0.2953	1.4451	0.8645	0.5	4.186
1	1	7	8	430	2639	2209	0.837	1.5416	0.2512	1.2904	0.791	0.439	5.277
1	1	7	9	479	2382	1903	0.799	1.8931	0.3807	1.5124	0.7995	0.501	2.354
1	1	8	1	618	2225	1607	0.722	2.0677	0.5743	1.4934	0.4832	0.441	0.602
1	1	8	2	589	2254	1665	0.739	1.913	0.4999	1.4131	0.4702	0.317	0.737
1	1	8	3	506	2881	2375	0.824	1.8059	0.3172	1.4887	0.7491	0.409	2.632
1	1	8	4	534	2151	1617	0.752	1.8036	0.4478	1.3559	0.6364	0.382	1.485
1	1	8	5	564	2208	1644	0.745	1.9972	0.5101	1.487	0.6395	0.399	1.101
1	1	8	6	602	2343	1741	0.743	1.8933	0.4864	1.4068	0.5931	0.389	1.113
1	1	8	7	545	2165	1620	0.748	1.8886	0.4754	1.4132	0.656	0.476	1.364
1	1	8	8	597	2176	1579	0.726	2.0122	0.5521	1.4601	0.5946	0.414	0.903
1	1	8	9	614	1976	1362	0.689	2.2652	0.7039	1.5614	0.7268	0.233	0.853
1	1	9	1	574	2668	2094	0.785	1.8935	0.4074	1.4861	0.6409	0.473	1.461
1	1	9	2	482	2669	2187	0.819	1.8247	0.3295	1.4952	0.8108	0.444	2.946
1	1	9	3	630	2256	1626	0.721	2.0411	0.57	1.4711	0.5691	0.489	0.798
1	1	9	4	585	2190	1605	0.733	2.0035	0.5352	1.4683	0.569	0.487	0.867
1	1	9	5	557	2132	1575	0.739	2.15	0.5617	1.5883	0.6232	0.377	0.849
1	1	9	6	479	1547	1068	0.69	2.0322	0.6292	1.403	0.4979	0.106	0.604
1	1	9	7	615	2204	1589	0.721	2.095	0.5846	1.5104	0.4762	0.45	0.568
1	1	9	8	575	2493	1918	0.769	1.9071	0.4399	1.4672	0.5722	0.412	1.118
1	1	9	9	634	2258	1624	0.719	2.1219	0.5958	1.5261	0.5676	0.507	0.715
1	1	10	1	500	2850	2350	0.825	1.8519	0.3249	1.527	0.798	0.4	2.778
1	1	10	2	-	-	-	-	-	-	-	-	-	-
1	1	10	3	555	2318	1763	0.761	1.9042	0.4559	1.4483	0.6334	0.429	1.297
1	1	10	4	484	2470	1986	0.804	1.9608	0.3842	1.5766	0.8716	0.542	2.588
1	1	10	5	492	2891	2399	0.83	1.8814	0.3202	1.5612	0.8928	0.481	3.462
1	1	10	6	527	2421	1894	0.782	1.9574	0.4261	1.5313	0.8045	0.546	2.032
1	1	10	7	-	-	-	-	-	-	-	-	-	-
1	1	10	8	628	2222	1594	0.717	2.2448	0.6344	1.6103	0.6839	0.479	0.835
1	1	10	9	561	2375	1814	0.764	2.1132	0.4992	1.614	0.7688	0.406	1.392
1	1	11	1	584	2277	1693	0.744	2.0347	0.5219	1.5129	0.68	0.469	1.163
1	1	11	2	449	1614	1165	0.722	2.1307	0.5927	1.5379	0.9056	0.358	1.744
1	1	11	3	528	2370	1842	0.777	2.1646	0.4822	1.6824	0.8101	0.516	1.497
1	1	11	4	618	2113	1495	0.708	2.251	0.6584	1.5927	0.5849	0.442	0.624
1	1	11	5	506	1997	1491	0.747	2.2274	0.5644	1.663	0.648	0.369	0.845
1	1	11	6	-	-	-	-	-	-	-	-	-	-
1	1	11	7	540	2670	2130	0.798	2.2365	0.4523	1.7842	0.9407	0.624	1.967
1	1	11	8	550	2731	2181	0.799	2.1444	0.4319	1.7125	0.8276	0.517	1.729
1	1	11	9	574	2494	1920	0.77	2.2083	0.5082	1.7001	0.7278	0.499	1.134
1	1	12	1	609	2412	1803	0.748	2.2257	0.562	1.6637	0.6155	0.492	0.781
1	1	12	2	633	2329	1696	0.728	2.2576	0.6136	1.644	0.5729	0.492	0.635
1	1	12	3	622	2291	1669	0.729	2.1437	0.582	1.5617	0.5811	0.486	0.742
1	1	12	4	645	2386	1741	0.73	2.2427	0.6063	1.6364	0.6006	0.586	0.698
1	1	12	5	590	2378	1788	0.752	2.1196	0.5259	1.5937	0.5758	0.441	0.809
1	1	12	6	578	2583	2005	0.776	2.1433	0.4796	1.6637	0.7261	0.467	1.253
1	1	12	7	563	2201	1638	0.744	2.0991	0.5369	1.5622	0.6952	0.62	1.112
1	1	12	8	693	2610	1917	0.734	2.5933	0.6886	1.9048	0.5554	0.553	0.439
1	1	12	9	606	2474	1868	0.755	2.3365	0.5723	1.7642	0.6989	0.552	0.865
1	2	1	1	439	2323	1884	0.811	1.5733	0.2973	1.276	0.7328	0.311	3.68
1	2	1	2	463	1998	1535	0.768	1.8663	0.4325	1.4338	0.7585	0.359	1.995
1	2	1	3	441	2404	1963	0.817	1.6447	0.3017	1.343	0.73	0.307	3.223
1	2	1	4	446	2722	2276	0.836	1.5009	0.2459	1.2549	0.7438	0.34	4.948
1	2	1	5	446	2869	2423	0.845	1.6282	0.2531	1.3751	0.7588	0.27	4.108
1	2	1	6	424	2391	1967	0.823	1.665	0.2953	1.3697	0.5919	0.373	2.12
1	2	2	1	473	2806	2333	0.831	1.7182	0.2896	1.4286	0.8756	0.38	4.546
1	2	2	2	497	2629	2132	0.811	1.8601	0.3516	1.5084	0.8377	0.319	2.88
1	2	2	3	464	2606	2142	0.822	1.7316	0.3083	1.4233	0.8272	0.359	3.7
1	2	2	4	453	2694	2241	0.832	1.7498	0.2942	1.4556	0.8145	0.338	3.592
1	2	2	5	455	2300	1845	0.802	1.6514	0.3267	1.3247	0.7123	0.304	2.856
1	2	2	6	450	2636	2186	0.829	1.5987	0.2729	1.3258	0.7387	0.271	3.823
1	2	2	7	460	2984	2524	0.846	1.7154	0.2644	1.451	0.8157	0.318	4.108
1	2	2	8	468	2966	2498	0.842	1.6075	0.2537	1.3539	0.7387	0.298	3.987
1	2	2	9	430	2712	2282	0.841	1.4624	0.2319	1.2305	0.7339	0.32	5.363
1	2	3	1	475	2680	2205	0.823	1.7279	0.3062	1.4216	0.8472	0.394	3.962
1	2	3	2	463	2867	2404	0.839	1.7521	0.2829	1.4691	0.902	0.416	4.714
1	2	3	3	465	2833	2368	0.836	1.758	0.2886	1.4695	0.8768	0.376	4.286
1	2	3	4	487	2136	1649	0.772	2.0851	0.4754	1.6097	0.9244	0.33	2.191
1	2	3	5	440	2602	2162	0.831	1.6733	0.283	1.3904	0.9016	0.302	5.417
1	2	3	6	490	2161	1671	0.773	1.9688	0.4464	1.5224	0.912	0.369	2.588
1	2	3	7	428	2379	1951	0.82	1.6277	0.2928	1.3349	0.7369	0.213	3.451
1	2	3	8	501	2662	2161	0.812	2.002	0.3768	1.6252	0.8092	0.241	2.137
1	2	3	9	416	2495	2079	0.833	1.5135	0.2524	1.2612	0.6952	0.207	4.056
1	2	4	1	446	2493	2047	0.821	1.6727	0.2992	1.3735	0.7937	0.277	3.757
1	2	4	2	463	2369	1906	0.805	1.8924	0.3699	1.5226	0.9035	0.354	3.175
1	2	4	3	468	2205	1737	0.788	1.9555	0.415	1.5404	0.6155	0.091	1.263
1	2	4	4	505	2265	1760	0.777	1.9499	0.4347	1.5152	1.0133	0.444	3.608
1	2	4	5	469	2902	2433	0.838	1.8631	0.3011	1.562	0.9386	0.366	4.192
1	2	4	6	494	2568	2074	0.808	1.745	0.3357	1.4093	0.9384	0.296	4.794
1	2	4	7	501	2501	2000	0.8	1.7917	0.3589	1.4328	0.9478	0.298	4.354
1	2	4	8	457	2511	2054	0.818	1.7499	0.3185	1.4314	0.8488	0.307	3.742
1	2	4	9	419	2802	2383	0.85	1.4825	0.2217	1.2609	0.7937	0.32	6.517
1	2	5	1	-	-	-	-	-	-	-	-	-	-
1	2	6	1	-	-	-	-	-	-	-	-	-	-
1	2	7	1	544	2421	1877	0.775	2.1384	0.4805	1.6579	0.8214	0.347	1.585
1	2	7	2	502	2315	1813	0.783	1.8422	0.3995	1.4427	0.7735	0.322	2.266
1	2	7	3	517	2331	1814	0.778	1.951	0.4327	1.5183	0.7943	0.348	1.973
1	2	7	4	482	2215	1733	0.782	1.8953	0.4124	1.4829	0.8155	0.295	2.318
1	2	7	5	471	2503	2032	0.812	1.8414	0.3465	1.4949	0.9453	0.408	4.03
1	2	7	6	468	2589	2121	0.819	1.8926	0.3421	1.5505	0.9423	0.429	3.71
1	2	7	7	437	1742	1305	0.749	1.7603	0.4416	1.3187	0.7185	0.272	2.031
1	2	7	8	453	1875	1422	0.758	1.8003	0.435	1.3653	0.6856	0.266	1.758
1	2	7	9	467	1935	1468	0.759	1.9584	0.4727	1.4858	0.7864	0.334	1.805
1	2	8	1	536	2547	2011	0.79	2.0101	0.423	1.5871	0.9092	0.462	2.503
1	2	8	2	500	2421	1921	0.793	1.9875	0.4105	1.5771	0.8136	0.293	2.06
1	2	8	3	479	2765	2286	0.827	1.8261	0.3163	1.5097	0.8434	0.308	3.308
1	2	8	4	513	2539	2026	0.798	1.8963	0.3832	1.5132	0.8238	0.387	2.489
1	2	8	5	509	2891	2382	0.824	1.8559	0.3267	1.5291	0.7902	0.255	2.697
1	2	8	6	489	2398	1909	0.796	1.9325	0.3941	1.5385	0.8575	0.366	2.544
1	2	8	7	450	2616	2166	0.828	1.7729	0.305	1.468	0.9109	0.384	4.439
1	2	8	8	479	2177	1698	0.78	1.8331	0.4033	1.4298	0.7663	0.39	2.233
1	2	8	9	477	2273	1796	0.79	1.844	0.387	1.4571	0.7926	0.428	2.436
1	2	9	1	514	2289	1775	0.775	1.8844	0.4231	1.4612	0.7533	0.403	1.95
1	2	9	2	515	2223	1708	0.768	1.8837	0.4364	1.4473	0.694	0.357	1.622
1	2	9	3	510	2164	1654	0.764	1.8684	0.4403	1.428	0.6683	0.306	1.527
1	2	9	4	457	2351	1894	0.806	1.6969	0.3298	1.367	0.7528	0.337	2.993
1	2	9	5	448	2689	2241	0.833	1.7493	0.2914	1.4579	0.8659	0.342	4.182
1	2	9	6	502	1841	1339	0.727	2.0389	0.556	1.4829	0.6291	0.221	0.964
1	2	9	7	779	2497	1718	0.688	2.3725	0.7402	1.6324	0.3402	0.335	0.245
1	2	9	8	472	2725	2253	0.827	1.8469	0.3199	1.527	0.9367	0.467	4.101
1	2	9	9	978	2636	1658	0.629	2.7502	1.0204	1.7298	0.2984	0.395	0.128
1	2	10	1	475	2393	1918	0.802	1.8261	0.3625	1.4636	0.7684	0.252	2.444
1	2	10	2	486	2358	1872	0.794	2.0299	0.4184	1.6115	0.9349	0.447	2.622
1	2	10	3	464	2765	2301	0.832	1.8758	0.3148	1.561	0.9511	0.425	4.123
1	2	10	4	593	2094	1501	0.717	2.0351	0.5763	1.4587	0.4772	0.363	0.605
1	2	10	5	587	2168	1581	0.729	1.978	0.5355	1.4424	0.4388	0.328	0.595
1	2	10	6	622	2095	1473	0.703	2.0268	0.6018	1.4251	0.3773	0.25	0.421
1	2	10	7	544	2220	1676	0.755	1.8424	0.4515	1.3909	0.5934	0.375	1.244
1	2	10	8	535	2238	1703	0.761	1.8219	0.4355	1.3864	0.6602	0.349	1.588
1	2	10	9	541	2332	1791	0.768	2.0303	0.471	1.5593	0.7348	0.394	1.453
1	2	11	1	501	2433	1932	0.794	1.9007	0.3914	1.5093	0.864	0.325	2.717
1	2	11	2	492	1406	914	0.65	2.2603	0.791	1.4694	0.6816	0.246	0.711
1	2	11	3	526	2547	2021	0.793	2.0277	0.4188	1.609	0.8041	0.451	1.893
1	2	11	4	454	2534	2080	0.821	2.0426	0.366	1.6766	0.8657	0.343	2.395
1	2	11	5	473	2739	2266	0.827	2.0038	0.346	1.6578	0.9737	0.405	3.403
1	2	11	6	503	2404	1901	0.791	1.8755	0.3924	1.4831	0.7747	0.325	2.204
1	2	11	7	474	2812	2338	0.831	1.879	0.3167	1.5623	0.9649	0.382	4.24
1	2	11	8	488	2237	1749	0.782	1.797	0.392	1.405	0.7398	0.496	2.218
1	2	11	9	553	2238	1685	0.753	1.9024	0.4701	1.4323	0.5738	0.437	1.07
1	2	12	1	482	2279	1797	0.789	1.9138	0.4048	1.5091	0.7986	0.319	2.19
1	2	12	2	463	2552	2089	0.819	1.9384	0.3517	1.5868	0.9214	0.321	3.223
1	2	12	3	434	2297	1863	0.811	1.7708	0.3346	1.4362	0.8619	0.355	3.638
1	2	12	4	546	2117	1571	0.742	2.0813	0.5368	1.5445	0.6322	0.413	0.958
1	2	12	5	488	2694	2206	0.819	2.0171	0.3654	1.6518	0.9824	0.43	3.289
1	2	12	6	524	2407	1883	0.782	2.0553	0.4474	1.6078	0.7369	0.453	1.479
1	2	12	7	510	2199	1689	0.768	2.0983	0.4867	1.6117	0.7729	0.365	1.454
1	2	12	8	521	2138	1617	0.756	2.1539	0.5249	1.629	0.7364	0.404	1.189
1	2	12	9	478	2152	1674	0.778	1.9391	0.4307	1.5084	0.7398	0.396	1.738
2	1	1	1	581	2391	1810	0.757	1.8847	0.458	1.4267	0.6109	0.384	1.238
2	1	1	2	535	2636	2101	0.797	2.1224	0.4308	1.6917	0.7794	0.4	1.581
2	1	1	3	412	1163	751	0.646	2.144	0.7595	1.3845	0.8074	0.395	1.19
2	1	1	4	-	-	-	-	-	-	-	-	-	-
2	1	1	5	562	1883	1321	0.702	2.0006	0.5971	1.4035	0.6768	0.448	1.094
2	1	1	6	597	1950	1353	0.694	1.9529	0.5979	1.355	0.5839	0.391	0.879
2	1	1	7	506	1941	1435	0.739	1.7182	0.4479	1.2703	0.671	0.436	1.848
2	1	1	8	524	2037	1513	0.743	1.7631	0.4535	1.3095	0.6794	0.443	1.766
2	1	1	9	527	2639	2112	0.8	1.8197	0.3634	1.4563	0.8281	0.457	2.903
2	1	2	1	542	2204	1662	0.754	1.7564	0.4319	1.3245	0.6646	0.436	1.759
2	1	2	2	514	2143	1629	0.76	1.7958	0.4307	1.3651	0.8371	0.561	2.798
2	1	2	3	515	2355	1840	0.781	1.721	0.3764	1.3447	0.7432	0.463	2.565
2	1	2	4	513	1916	1403	0.732	1.901	0.509	1.392	0.501	0.405	0.809
2	1	2	5	465	2580	2115	0.82	1.6362	0.2949	1.3413	0.6006	0.301	2.254
2	1	2	6	460	2748	2288	0.833	1.4834	0.2483	1.2351	0.6014	0.287	3.182
2	1	2	7	504	2453	1949	0.795	1.623	0.3335	1.2896	0.4532	0.215	1.291
2	1	2	8	457	2745	2288	0.834	1.5707	0.2615	1.3092	0.6449	0.378	3.094
2	1	2	9	588	2117	1529	0.722	1.8007	0.5002	1.3006	0.4525	0.319	0.771
2	1	3	1	549	2519	1970	0.782	1.7307	0.3772	1.3535	0.6259	0.419	1.784
2	1	3	2	536	2369	1833	0.774	1.7711	0.4007	1.3704	0.6848	0.469	1.929
2	1	3	3	609	2317	1708	0.737	1.9952	0.5244	1.4708	0.5184	0.329	0.765
2	1	3	4	544	2062	1518	0.736	1.8426	0.4861	1.3565	0.6362	0.421	1.338
2	1	3	5	617	2022	1405	0.695	1.9706	0.6013	1.3693	0.4844	0.301	0.632
2	1	3	6	586	2017	1431	0.709	1.9327	0.5615	1.3712	0.5605	0.383	0.874
2	1	3	7	503	2510	2007	0.8	1.7797	0.3566	1.4231	0.6275	0.374	1.768
2	1	3	8	543	2117	1574	0.744	1.785	0.4578	1.3272	0.5987	0.412	1.334
2	1	3	9	639	1949	1310	0.672	2.0673	0.6778	1.3895	0.4455	0.467	0.468
2	1	4	1	495	2478	1983	0.8	1.784	0.3564	1.4276	0.7149	0.397	2.252
2	1	4	2	553	1978	1425	0.72	1.9367	0.5415	1.3952	0.7099	0.463	1.378
2	1	4	3	545	2079	1534	0.738	1.9343	0.5071	1.4273	0.7536	0.476	1.628
2	1	4	4	532	1902	1370	0.72	1.8975	0.5307	1.3668	0.6904	0.452	1.385
2	1	4	5	514	1841	1327	0.721	1.859	0.519	1.34	0.6291	0.412	1.229
2	1	4	6	532	2081	1549	0.744	1.9079	0.4878	1.4202	0.639	0.417	1.248
2	1	4	7	467	2168	1701	0.785	1.6136	0.3476	1.266	0.588	0.321	1.958
2	1	4	8	491	1995	1504	0.754	1.7294	0.4256	1.3038	0.6389	0.404	1.702
2	1	4	9	494	2135	1641	0.769	1.7559	0.4063	1.3496	0.6103	0.346	1.561
2	1	5	1	535	2893	2358	0.815	1.9304	0.357	1.5734	0.8101	0.398	2.423
2	1	5	2	556	2126	1570	0.738	2.0266	0.53	1.4966	0.7493	0.477	1.397
2	1	5	3	493	2157	1664	0.771	1.8534	0.4236	1.4298	0.7708	0.485	2.13
2	1	5	4	528	2892	2364	0.817	2.0498	0.3742	1.6756	1.0143	0.488	3.35
2	1	5	5	556	2175	1619	0.744	2.3212	0.5934	1.7278	0.826	0.465	1.149
2	1	5	6	523	1874	1351	0.721	2.1923	0.6118	1.5805	0.7662	0.483	1.109
2	1	5	7	511	2228	1717	0.771	1.9275	0.4421	1.4854	0.8331	0.506	2.226
2	1	5	8	472	2006	1534	0.765	1.6828	0.3959	1.2868	0.7458	0.452	2.662
2	1	5	9	487	2622	2135	0.814	1.8184	0.3377	1.4807	0.8593	0.458	3.334
2	1	6	1	610	2054	1444	0.703	2.1175	0.6289	1.4886	0.5814	0.442	0.716
2	1	6	2	574	2141	1567	0.732	1.8258	0.4895	1.3363	0.5705	0.439	1.114
2	1	6	3	575	2005	1430	0.713	1.7534	0.5028	1.2505	0.5745	0.414	1.206
2	1	6	4	577	2199	1622	0.738	2.0237	0.531	1.4927	0.6111	0.529	0.963
2	1	6	5	534	2337	1803	0.772	1.8411	0.4207	1.4204	0.6366	0.419	1.489
2	1	6	6	501	2115	1614	0.763	1.5727	0.3725	1.2001	0.5227	0.298	1.581
2	1	6	7	503	2378	1875	0.788	1.8026	0.3813	1.4213	0.6747	0.449	1.868
2	1	6	8	488	1992	1504	0.755	1.9545	0.4788	1.4757	0.7221	0.491	1.511
2	1	6	9	453	2133	1680	0.788	1.7213	0.3656	1.3557	0.7545	0.508	2.704
2	1	7	1	489	2693	2204	0.818	1.8037	0.3275	1.4762	0.7729	0.452	2.746
2	1	7	2	455	2809	2354	0.838	1.6929	0.2742	1.4187	0.8112	0.435	4.081
2	1	7	3	474	2932	2458	0.838	1.6833	0.2721	1.4111	0.7371	0.394	3.369
2	1	7	4	509	1810	1301	0.719	2.0169	0.5672	1.4497	0.6708	0.379	1.091
2	1	7	5	571	1930	1359	0.704	1.9969	0.5908	1.4061	0.506	0.346	0.67
2	1	7	6	577	2434	1857	0.763	1.9402	0.4599	1.4803	0.5181	0.369	0.893
2	1	7	7	458	2282	1824	0.799	1.8349	0.3683	1.4667	0.8033	0.481	2.628
2	1	7	8	460	2612	2152	0.824	1.7262	0.304	1.4222	0.7825	0.468	3.315
2	1	7	9	449	2233	1784	0.799	1.751	0.3521	1.3989	0.7692	0.472	2.772
2	1	8	1	544	2221	1677	0.755	1.8538	0.4541	1.3997	0.6285	0.458	1.355
2	1	8	2	518	2198	1680	0.764	1.7816	0.4199	1.3618	0.6395	0.44	1.612
2	1	8	3	502	2355	1853	0.787	1.8498	0.3943	1.4555	0.6496	0.434	1.608
2	1	8	4	457	2907	2450	0.843	1.6269	0.2558	1.3712	0.8093	0.414	4.746
2	1	8	5	502	2166	1664	0.768	1.792	0.4153	1.3766	0.6635	0.383	1.721
2	1	8	6	492	1826	1334	0.731	2.0238	0.5453	1.4785	0.379	0.109	0.462
2	1	8	7	515	2347	1832	0.781	1.8532	0.4066	1.4465	0.8188	0.527	2.504
2	1	8	8	514	2308	1794	0.777	1.7153	0.382	1.3333	0.6904	0.446	2.185
2	1	8	9	495	2142	1647	0.769	1.7532	0.4052	1.3481	0.7186	0.449	2.167
2	1	9	1	544	2486	1942	0.781	1.7024	0.3725	1.3298	0.5471	0.37	1.466
2	1	9	2	511	2660	2149	0.808	1.5587	0.2994	1.2593	0.6264	0.404	2.671
2	1	9	3	545	2014	1469	0.729	1.9644	0.5316	1.4328	0.5569	0.482	0.872
2	1	9	4	448	2372	1924	0.811	1.7913	0.3383	1.453	0.805	0.461	2.979
2	1	9	5	460	2594	2134	0.823	1.5037	0.2666	1.237	0.6794	0.385	3.759
2	1	9	6	460	2438	1978	0.811	1.7372	0.3278	1.4094	0.7724	0.436	3.001
2	1	9	7	456	2527	2071	0.82	1.5867	0.2863	1.3004	0.6775	0.398	3.113
2	1	9	8	552	2371	1819	0.767	2.0984	0.4885	1.6099	0.5452	0.355	0.804
2	1	9	9	477	2476	1999	0.807	1.5905	0.3064	1.2841	0.6321	0.383	2.554
2	1	10	1	469	2561	2092	0.817	1.4747	0.2701	1.2047	0.596	0.392	2.962
2	1	10	2	491	2787	2296	0.824	1.51	0.266	1.244	0.6095	0.37	2.975
2	1	10	3	455	2389	1934	0.81	1.6783	0.3196	1.3587	0.6934	0.386	2.64
2	1	10	4	512	2054	1542	0.751	1.6857	0.4202	1.2655	0.5392	0.369	1.326
2	1	10	5	496	2663	2167	0.814	1.5085	0.281	1.2275	0.503	0.326	2.011
2	1	10	6	541	2255	1714	0.76	1.6996	0.4078	1.2919	0.407	0.295	0.857
2	1	10	7	490	2526	2036	0.806	1.5705	0.3047	1.2659	0.6945	0.385	3.216
2	1	10	8	454	2666	2212	0.83	1.6167	0.2753	1.3414	0.6858	0.281	3.153
2	1	10	9	528	2428	1900	0.783	1.837	0.3995	1.4376	0.5955	0.34	1.385
2	1	11	1	517	2514	1997	0.794	1.6756	0.3446	1.331	0.5665	0.349	1.708
2	1	11	2	483	2729	2246	0.823	1.681	0.2975	1.3835	0.5969	0.32	2.099
2	1	11	3	464	2576	2112	0.82	1.5505	0.2793	1.2712	0.5152	0.272	2.001
2	1	11	4	511	2215	1704	0.769	1.7815	0.411	1.3705	0.5059	0.322	1.095
2	1	11	5	447	2272	1825	0.803	1.4685	0.2889	1.1795	0.6024	0.327	2.902
2	1	11	6	415	2345	1930	0.823	1.2849	0.2274	1.0575	0.5463	0.282	3.868
2	1	11	7	538	2564	2026	0.79	1.9395	0.407	1.5326	0.5454	0.333	1.073
2	1	11	8	560	2569	2009	0.782	1.789	0.39	1.399	0.5014	0.343	1.12
2	1	11	9	543	2625	2082	0.793	1.6335	0.3379	1.2956	0.4823	0.276	1.392
2	1	12	1	-	-	-	-	-	-	-	-	-	-
2	1	12	2	628	2134	1506	0.706	2.4675	0.7261	1.7413	0.6834	0.533	0.628
2	1	12	3	554	2160	1606	0.744	2.1053	0.54	1.5653	0.6355	0.435	0.941
2	1	12	4	514	2120	1606	0.758	1.9455	0.4717	1.4738	0.7681	0.539	1.748
2	1	12	5	-	-	-	-	-	-	-	-	-	-
2	1	12	6	693	2026	1333	0.658	2.5105	0.8587	1.6518	0.4015	0.568	0.246
2	1	12	7	484	2370	1886	0.796	1.7276	0.3528	1.3748	0.7297	0.488	2.551
2	1	12	8	495	2785	2290	0.822	1.7979	0.3196	1.4783	0.7928	0.484	2.975
2	1	12	9	671	1959	1288	0.657	2.2622	0.7748	1.4873	0.3926	0.41	0.304
2	2	1	1	626	2085	1459	0.7	2.5756	0.7733	1.8023	0.5275	0.338	0.374
2	2	1	2	469	1743	1274	0.731	1.8598	0.5004	1.3594	0.7864	0.331	2.005
2	2	1	3	479	1773	1294	0.73	1.887	0.5098	1.3772	0.6173	0.328	1.163
2	2	1	4	501	1858	1357	0.73	1.9628	0.5292	1.4335	0.618	0.294	1.046
2	2	1	5	523	2110	1587	0.752	2.1612	0.5357	1.6255	0.7539	0.379	1.214
2	2	1	6	472	1923	1451	0.755	1.8023	0.4424	1.36	0.7029	0.359	1.825
2	2	1	7	506	1545	1039	0.672	2.243	0.7346	1.5084	0.4689	0.299	0.413
2	2	1	8	489	1814	1325	0.73	1.9314	0.5207	1.4108	0.6133	0.266	1.079
2	2	1	9	471	1896	1425	0.752	1.9016	0.4724	1.4292	0.6409	0.216	1.293
2	2	2	1	475	2025	1550	0.765	1.807	0.4239	1.3832	0.6907	0.324	1.801
2	2	2	2	641	2092	1451	0.694	2.7033	0.8283	1.875	0.5725	0.339	0.368
2	2	2	3	481	2189	1708	0.78	1.7634	0.3875	1.3759	0.7709	0.384	2.566
2	2	2	4	545	1942	1397	0.719	2.2246	0.6243	1.6003	0.6507	0.359	0.789
2	2	2	5	417	1867	1450	0.777	1.5953	0.3563	1.239	0.6896	0.303	2.736
2	2	2	6	426	1797	1371	0.763	1.7031	0.4037	1.2994	0.6672	0.286	1.995
2	2	2	7	525	2288	1763	0.771	1.8474	0.4239	1.4235	0.5935	0.316	1.3
2	2	2	8	478	1763	1285	0.729	1.7537	0.4755	1.2782	0.5441	0.169	1.136
2	2	2	9	466	2261	1795	0.794	1.7202	0.3545	1.3657	0.6916	0.282	2.297
2	2	3	1	450	1884	1434	0.761	1.7992	0.4297	1.3694	0.7697	0.345	2.273
2	2	3	2	495	1899	1404	0.739	1.8348	0.4783	1.3565	0.8841	0.406	2.893
2	2	3	3	443	1924	1481	0.77	1.6855	0.3881	1.2974	0.7122	0.315	2.414
2	2	3	4	421	1849	1428	0.772	1.659	0.3777	1.2813	0.6837	0.236	2.339
2	2	3	5	437	1878	1441	0.767	1.6891	0.393	1.296	0.6853	0.246	2.191
2	2	3	6	476	1871	1395	0.746	1.6907	0.4301	1.2606	0.656	0.276	1.881
2	2	3	7	437	2206	1769	0.802	1.5594	0.3089	1.2505	0.6758	0.24	3.052
2	2	3	8	415	2147	1732	0.807	1.4723	0.2846	1.1877	0.6604	0.253	3.55
2	2	3	9	393	2204	1811	0.822	1.4875	0.2652	1.2222	0.7161	0.309	4.383
2	2	4	1	449	2313	1864	0.806	1.7224	0.3343	1.388	0.6709	0.287	2.255
2	2	4	2	457	2088	1631	0.781	1.7707	0.3875	1.3831	0.6903	0.344	2.008
2	2	4	3	456	1937	1481	0.765	1.9531	0.4598	1.4933	0.7663	0.385	1.753
2	2	4	4	629	2340	1711	0.731	2.3925	0.6431	1.7494	0.5961	0.312	0.588
2	2	4	5	438	1751	1313	0.75	1.7514	0.4381	1.3133	0.7142	0.305	2.04
2	2	4	6	448	1642	1194	0.727	1.72	0.4693	1.2507	0.6505	0.28	1.679
2	2	4	7	465	1862	1397	0.75	1.6759	0.4185	1.2574	0.6966	0.347	2.227
2	2	4	8	480	1733	1253	0.723	1.7824	0.4937	1.2887	0.6583	0.3	1.529
2	2	4	9	465	1648	1183	0.718	1.7999	0.5079	1.292	0.675	0.317	1.546
2	2	5	1	-	-	-	-	-	-	-	-	-	-
2	2	6	1	-	-	-	-	-	-	-	-	-	-
2	2	7	1	450	2294	1844	0.804	1.8763	0.3681	1.5083	0.8973	0.416	3.207
2	2	7	2	489	2607	2118	0.812	2.0537	0.3852	1.6685	0.9351	0.421	2.689
2	2	7	3	593	2619	2026	0.774	2.2617	0.5121	1.7496	0.6736	0.375	0.946
2	2	7	4	426	2285	1859	0.814	1.6145	0.301	1.3135	0.7433	0.36	3.523
2	2	7	5	489	2111	1622	0.768	1.7861	0.4137	1.3723	0.5626	0.362	1.29
2	2	7	6	587	2459	1872	0.761	2.1511	0.5135	1.6376	0.685	0.41	1.066
2	2	7	7	530	2510	1980	0.789	1.9717	0.4163	1.5553	0.791	0.413	1.961
2	2	7	8	441	1933	1492	0.772	1.747	0.3986	1.3484	0.7095	0.305	2.15
2	2	7	9	573	2421	1848	0.763	2.3308	0.5517	1.7792	0.852	0.469	1.272
2	2	8	1	489	2111	1622	0.768	1.7861	0.4137	1.3723	0.5626	0.362	1.29
2	2	8	2	430	2618	2188	0.836	1.5995	0.2627	1.3368	0.7441	0.305	3.995
2	2	8	3	512	2549	2037	0.799	2.0243	0.4066	1.6177	0.7799	0.368	1.829
2	2	8	4	457	2457	2000	0.814	1.7238	0.3206	1.4031	0.7331	0.297	2.778
2	2	8	5	457	2270	1813	0.799	1.8166	0.3657	1.4509	0.8019	0.341	2.698
2	2	8	6	464	2297	1833	0.798	1.9121	0.3862	1.5259	0.8657	0.36	2.71
2	2	8	7	504	2467	1963	0.796	1.8272	0.3733	1.4539	0.717	0.481	2.074
2	2	8	8	474	2133	1659	0.778	1.776	0.3947	1.3813	0.7102	0.411	2.086
2	2	8	9	444	2140	1696	0.793	1.7219	0.3573	1.3647	0.7652	0.295	2.832
2	2	9	1	502	2067	1565	0.757	1.9662	0.4775	1.4887	0.7582	0.376	1.645
2	2	9	2	494	2116	1622	0.767	1.8793	0.4387	1.4406	0.7007	0.433	1.655
2	2	9	3	483	2120	1637	0.772	1.8616	0.4241	1.4375	0.735	0.389	1.905
2	2	9	4	689	2397	1708	0.713	2.5322	0.7279	1.8043	0.6021	0.452	0.49
2	2	9	5	654	2531	1877	0.742	2.4043	0.6213	1.783	0.6535	0.454	0.691
2	2	9	6	681	2420	1739	0.719	2.6453	0.7444	1.9009	0.5629	0.394	0.406
2	2	9	7	470	1819	1349	0.742	1.9185	0.4957	1.4228	0.7309	0.452	1.58
2	2	9	8	443	1672	1229	0.735	2.0138	0.5335	1.4802	0.7805	0.442	1.537
2	2	9	9	450	1710	1260	0.737	1.9877	0.5231	1.4646	0.7742	0.42	1.579
2	2	10	1	541	2264	1723	0.761	1.967	0.47	1.497	0.6864	0.5	1.371
2	2	10	2	525	2418	1893	0.783	1.8548	0.4027	1.452	0.6896	0.509	1.758
2	2	10	3	508	2381	1873	0.787	1.8404	0.3927	1.4477	0.6593	0.41	1.675
2	2	10	4	480	1882	1402	0.745	1.8898	0.482	1.4078	0.8776	0.469	2.558
2	2	10	5	476	2088	1612	0.772	1.8883	0.4305	1.4578	0.7217	0.44	1.758
2	2	10	6	565	2064	1499	0.726	1.9791	0.5417	1.4373	0.6012	0.339	0.964
2	2	10	7	517	2165	1648	0.761	1.9539	0.4666	1.4873	0.6823	0.504	1.383
2	2	10	8	478	2246	1768	0.787	1.9314	0.411	1.5203	0.8152	0.404	2.214
2	2	10	9	498	2356	1858	0.789	1.866	0.3944	1.4716	0.7611	0.439	2.142
2	2	11	1	436	1832	1396	0.762	1.7055	0.4059	1.2996	0.674	0.285	2.023
2	2	11	2	459	1923	1464	0.761	1.8082	0.4316	1.3766	0.7823	0.386	2.322
2	2	11	3	483	2010	1527	0.76	1.9872	0.4775	1.5097	0.7959	0.451	1.774
2	2	11	4	-	-	-	-	-	-	-	-	-	-
2	2	11	5	432	2231	1799	0.806	1.7191	0.3329	1.3862	0.7451	0.293	2.815
2	2	11	6	454	1973	1519	0.77	1.8582	0.4276	1.4306	0.7723	0.348	2.112
2	2	11	7	487	2250	1763	0.784	1.8907	0.4092	1.4815	0.7933	0.487	2.207
2	2	11	8	459	2189	1730	0.79	1.8482	0.3875	1.4607	0.7844	0.361	2.365
2	2	11	9	464	2059	1595	0.775	1.8243	0.4111	1.4132	0.8656	0.43	2.979
2	2	12	1	479	2197	1718	0.782	1.814	0.3955	1.4185	0.753	0.42	2.237
2	2	12	2	489	2223	1734	0.78	1.8168	0.3996	1.4171	0.6693	0.418	1.747
2	2	12	3	463	2208	1745	0.79	1.7252	0.3618	1.3635	0.6892	0.413	2.233
2	2	12	4	504	2444	1940	0.794	1.8461	0.3807	1.4654	0.6647	0.411	1.731
2	2	12	5	501	2465	1964	0.797	1.8461	0.3752	1.4709	0.7122	0.35	1.994
2	2	12	6	483	2284	1801	0.789	1.8187	0.3846	1.4341	0.6752	0.276	1.824
2	2	12	7	478	2184	1706	0.781	1.8847	0.4125	1.4722	0.7473	0.404	1.952
2	2	12	8	456	2122	1666	0.785	1.8268	0.3926	1.4342	0.712	0.348	1.971
2	2	12	9	439	2626	2187	0.833	1.7464	0.2919	1.4544	0.8539	0.42	4.056

## Sheet: WP
Time	Treatment	Sample	ULM	POP	ULM	POP
1	1	1	-1.014	-0.906	-0.645	-0.905
1	1	2	-1.532	-0.574	-2.215	-0.86
1	1	3	-1.176	-	-2.707	-0.731
1	2	1	-0.775	-0.545	-0.91	-0.783
1	2	2	-0.703	-0.374	-0.865	-0.632
1	2	3	-0.553	-0.524	-0.844	-0.462
1	3	1	-0.785	-0.451	-0.682	-0.732
1	3	2	-0.633	-0.347	-0.43	-0.355
1	3	3	-0.542	-0.27	-0.525	-0.491
1	4	1	-0.552	-0.398	-0.82	-0.941
1	4	2	-0.658	-0.42	-0.562	-0.272
1	4	3	-0.422	-0.495	-0.462	-0.557
1	5	1	-0.753	-	-1.12	-
1	5	2	-0.679	-	-2.154	-
1	5	3	-0.678	-	-2.178	-
1	6	1	-0.682	-0.289	-0.816	-0.665
1	6	2	-0.623	-0.319	-0.956	-0.807
1	6	3	-0.58	-0.332	-0.72	-0.87
1	7	1	-0.588	-0.413	-0.576	-0.774
1	7	2	-0.55	-0.233	-0.703	-0.711
1	7	3	-0.586	-0.314	-0.957	-0.581
1	8	1	-0.552	-0.37	-0.789	-0.523
1	8	2	-0.506	-0.405	-0.62	-0.434
1	8	3	-0.572	-0.349	-0.72	-0.529
1	9	1	-0.831	-	-2.318	-
1	9	2	-0.626	-	-1.647	-
1	9	3	-1.036	-	-1.053	-
1	10	1	-0.417	-0.382	-0.73	-0.599
1	10	2	-0.655	-0.381	-0.794	-0.518
1	10	3	-0.406	-0.272	-0.919	-0.82
1	11	1	-0.43	-0.305	-0.502	-0.431
1	11	2	-0.64	-0.328	-0.562	-0.502
1	11	3	-0.566	-0.368	-0.781	-0.872
1	12	1	-0.547	-0.32	-1.005	-1.006
1	12	2	-0.682	-0.453	-1.501	-1.13
1	12	3	-0.645	-0.437	-0.957	-0.547
2	1	1	-2.266	-0.937	-1.818	-1.012
2	1	2	-1.648	-0.707	-2.376	-1.714
2	1	3	-1.824	-	-2.775	-1.511
2	2	1	-0.693	-0.412	-1.836	-1.479
2	2	2	-0.582	-0.433	-1.181	-1.408
2	2	3	-0.448	-0.407	-2.306	-1.364
2	3	1	-0.428	-0.326	-1.278	-0.924
2	3	2	-0.516	-0.367	-1.413	-1.175
2	3	3	-0.505	-0.375	-1.112	-0.924
2	4	1	-0.715	-0.324	-0.807	-0.974
2	4	2	-0.794	-0.417	-0.785	-1.133
2	4	3	-0.621	-0.487	-1.333	-0.815
2	5	1	-1.723	-	-1.65	-
2	5	2	-2.498	-	-1.507	-
2	5	3	-2.026	-	-1.596	-
2	6	1	-0.998	-0.561	-1.455	-
2	6	2	-0.787	-0.535	-1.612	-
2	6	3	-0.621	-0.446	-0.946	-0.607
2	7	1	-0.797	-0.637	-0.551	-0.558
2	7	2	-0.813	-0.418	-0.601	-0.759
2	7	3	-1.099	-0.522	-0.823	-0.664
2	8	1	-0.684	-0.423	-0.987	-1.33
2	8	2	-0.823	-0.239	-0.755	-0.595
2	8	3	-0.644	-0.27	-0.586	-0.585
2	9	1	-2.239	-	-0.856	-
2	9	2	0	-	-1.751	-
2	9	3	-1.098	-	-1.674	-
2	10	1	-0.781	-0.492	-1.035	-1.066
2	10	2	-0.727	-0.507	-1.098	-0.871
2	10	3	-0.592	-0.537	-0.856	-0.72
2	11	1	-0.594	-0.514	-1.448	-1.206
2	11	2	-0.571	-0.521	-0.826	-1.228
2	11	3	-0.634	-0.399	-0.951	-0.956
2	12	1	-0.554	-0.354	-1.676	-1.128
2	12	2	-0.457	-0.351	-0.886	-1.287
2	12	3	-0.291	-0.36	-1.468	-1.164
3	1	1	-1.712	-1.154	-1.043	-0.727
3	1	2	-1.165	-1.126	-1.596	-0.849
3	1	3	-2.116	-	-0.835	-1.021
3	2	1	-2.015	-1.596	-0.945	-1.172
3	2	2	-1.456	-1.11	-1.067	-1.12
3	2	3	-1.517	-1.527	-0.934	-0.807
3	3	1	-1.698	-1.194	-1.119	-1.044
3	3	2	-1.264	-1.322	-1.157	-1.133
3	3	3	-1.306	-1.162	-0.822	-1.071
3	4	1	-1.504	-1.342	-1.066	-1.146
3	4	2	-1.038	-1.551	-1.803	-2.137
3	4	3	-1.129	-0.51	-2.054	-1.444
3	5	1	-2.165	-	-1.61	-
3	5	2	-1.622	-	-1.573	-
3	5	3	-1.714	-	-2.385	-
3	6	1	-1.59	-1.32	-1.547	-1.408
3	6	2	-1.549	-1.671	-1.366	-1.119
3	6	3	-2.627	-2.021	-1.075	-1.18
3	7	1	-1.559	-1.476	-1.258	-1.359
3	7	2	-1.823	-1.528	-1.159	-1.202
3	7	3	-1.911	-1.44	-1.968	-2.085
3	8	1	-2.017	-2.32	-1.283	-1.743
3	8	2	-1.82	-1.748	-1.188	-1.483
3	8	3	-2.117	-2.193	-0.881	-1.142
3	9	1	-1.337	-	-2.327	-
3	9	2	-1.732	-	-1.322	-
3	9	3	-1.677	-	-2.278	-
3	10	1	-1.963	-1.357	-1.476	-1.298
3	10	2	-1.574	-1.411	-1.53	-0.528
3	10	3	-1.723	-1.64	-1.108	-1.503
3	11	1	-1.411	-0.939	-1.68	-1.565
3	11	2	-1.973	-1.158	-2.402	-2
3	11	3	-1.123	-1.077	-2.536	-2.837
3	12	1	-1.476	-1.597	-2.04	-2.401
3	12	2	-1.902	-1.689	-1.708	-2.102
3	12	3	-1.653	-1.069	-2.108	-2.082
4	1	1	-2.656	-	-1.778	-1.197
4	1	2	-2.892	-1.35	-2.996	-1.114
4	1	3	-2.665	-1.243	-2.595	-1.32
4	2	1	-1.971	-1.173	-2.051	-2.652
4	2	2	-1.807	-0.962	-1.644	-1.603
4	2	3	-1.531	-1.175	-1.727	-1.677
4	3	1	-1.796	-1.112	-2.208	-1.953
4	3	2	-1.866	-1.136	-1.917	-1.607
4	3	3	-1.708	-1.051	-1.746	-1.585
4	4	1	-1.092	-1.482	-1.853	-1.455
4	4	2	-1.161	-1.67	-1.692	-1.377
4	4	3	-2.621	-1.463	-1.485	-1.464
4	5	1	-2.657	-	-2.595	-
4	5	2	-2.322	-	-3.386	-
4	5	3	-2.055	-	-2.606	-
4	6	1	-1.926	-1.24	-1.693	-1.341
4	6	2	-2.028	-1.375	-1.603	-1.391
4	6	3	-1.812	-1.531	-1.307	-1.613
4	7	1	-1.691	-1.527	-1.691	-1.109
4	7	2	-1.826	-1.552	-1.655	-1.325
4	7	3	-1.562	-1.822	-1.167	-1.578
4	8	1	-1.768	-1.607	-1.834	-1.576
4	8	2	-1.817	-1.571	-1.572	-1.583
4	8	3	-2.011	-1.322	-2.085	-1.49
4	9	1	-2.712	-	-2.723	-
4	9	2	-2.648	-	-2.049	-
4	9	3	-2.322	-	-1.666	-
4	10	1	-1.654	-1.874	-1.693	-1.222
4	10	2	-1.726	-2.016	-1.999	-1.124
4	10	3	-2.013	-1.651	-2.003	-1.515
4	11	1	-1.653	-1.24	-2.189	-1.246
4	11	2	-1.458	-1.233	-1.972	-1.434
4	11	3	-1.367	-1.326	-1.438	-1.154
4	12	1	-1.788	-1.807	-2.105	-1.957
4	12	2	-1.923	-1.558	-1.939	-1.939
4	12	3	-1.072	-1.721	-2.107	-1.341
5	1	1	-	-	-1.203	-2.669
5	1	2	-	-	-1.788	-1.598
5	1	3	-	-	-1.985	-1.447
5	2	1	-	-	-1.744	-1.118
5	2	2	-	-	-2.742	-1.419
5	2	3	-	-	-2.641	-1.133
5	3	1	-	-	-0.619	-1.959
5	3	2	-	-	-1.29	-1.495
5	3	3	-	-	-0.85	-1.378
5	4	1	-	-	-1.048	-1.46
5	4	2	-	-	-1.653	-1.266
5	4	3	-	-	-1.331	-1.231
5	5	1	-	-	-2.687	-
5	5	2	-	-	-3.173	-
5	5	3	-	-	-2.862	-
5	6	1	-	-	-1.689	-1.299
5	6	2	-	-	-1.669	-1.772
5	6	3	-	-	-1.854	-0.673
5	7	1	-	-	-2.07	-2.023
5	7	2	-	-	-2.15	-1.011
5	7	3	-	-	-2.228	-0.868
5	8	1	-	-	-1.601	-1.444
5	8	2	-	-	-0.373	-1.85
5	8	3	-	-	-2.037	-1.353
5	9	1	-	-	-3.27	-
5	9	2	-	-	-1.937	-
5	9	3	-	-	-0.781	-
5	10	1	-	-	-1.535	-1.094
5	10	2	-	-	-1.781	-1.398
5	10	3	-	-	-1.574	-1.34
5	11	1	-	-	-1.656	-1.432
5	11	2	-	-	-1.284	-1.365
5	11	3	-	-	-1.733	-0.641
5	12	1	-	-	-1.895	-2.48
5	12	2	-	-	-1.903	-2.289
5	12	3	-	-	-1.59	-1.852
6	1	1	-2.54	-1.175	-1.548	-0.87
6	1	2	-2.098	-0.94	-2.713	-0.639
6	1	3	-2.357	-	-2.645	-1.047
6	2	1	-1.512	-0.674	-1.737	-4.742
6	2	2	-1.104	-0.61	-1.251	-1.103
6	2	3	-0.945	-0.587	-1.414	-1.007
6	3	1	-0.97	-0.446	-1.641	-0.937
6	3	2	-1.18	-0.471	-0.965	-0.904
6	3	3	-1.042	-0.49	-0.967	-0.576
6	4	1	-1.21	-0.54	-1.167	-0.703
6	4	2	-1.065	-0.46	-1.041	-0.904
6	4	3	-1.059	-0.391	-0.953	-0.898
6	5	1	-1.927	-	-2.638	-
6	5	2	-2.542	-	-3.29	-
6	5	3	-1.808	-	-2.435	-
6	6	1	-0.9	-1.149	-1.1	-0.915
6	6	2	-0.98	-0.814	-1.458	-0.854
6	6	3	-1.047	-0.927	-1.154	-1.111
6	7	1	-0.923	-0.721	-1.108	-0.848
6	7	2	-0.728	-0.492	-1.005	-0.791
6	7	3	-0.711	-0.546	-0.103	-0.93
6	8	1	-0.721	-0.485	-1.27	-0.934
6	8	2	-0.722	-0.457	-0.907	-0.874
6	8	3	-0.728	-0.408	-1.134	-0.813
6	9	1	-2.36	-	-2.228	-
6	9	2	-1.529	-	-2.012	-
6	9	3	-1.501	-	-1.801	-
6	10	1	-0.972	-0.412	-1.018	-0.673
6	10	2	-1.072	-0.702	-1.209	-0.811
6	10	3	-0.811	-0.692	-1.218	-0.856
6	11	1	-0.691	-0.584	-0.781	-0.835
6	11	2	-0.691	-0.528	-0.729	-0.792
6	11	3	-0.795	-0.513	-0.687	-0.896
6	12	1	-0.695	-0.488	-1.58	-0.882
6	12	2	-0.682	-0.504	-1.121	-0.793
6	12	3	-0.701	-0.467	-0.959	-0.636
7	1	1	-2.347	-1.052	-0.64	-0.79
7	1	2	-0.934	-0.618	-2.136	-1.015
7	1	3	-1.264	-	-1.044	-1.011
7	2	1	-0.86	-0.47	-1.161	-0.914
7	2	2	-0.671	-0.431	-0.97	-0.642
7	2	3	-0.69	-0.376	-0.89	-0.779
7	3	1	-0.637	-0.394	-0.86	-0.939
7	3	2	-0.532	-0.309	-0.623	-0.491
7	3	3	-0.565	-0.239	-0.689	-0.681
7	4	1	-0.966	-0.515	-0.905	-1.081
7	4	2	-0.793	-0.39	-0.6	-0.607
7	4	3	-0.721	-0.335	-0.899	-0.8
7	5	1	-1.046	-	-2.297	-
7	5	2	-2.07	-	-2.455	-
7	5	3	-1.583	-	-2.115	-
7	6	1	-0.646	-0.359	-0.571	-0.789
7	6	2	-0.623	-0.378	-1.442	-0.711
7	6	3	-0.565	-0.383	-0.928	-0.755
7	7	1	-0.926	-0.496	-0.751	-0.834
7	7	2	-0.504	-0.349	-0.857	-0.931
7	7	3	-0.564	-0.233	-0.861	-0.635
7	8	1	-0.677	-0.284	-0.583	-0.516
7	8	2	-0.547	-0.425	-0.747	-0.39
7	8	3	-0.632	-0.318	-0.613	-0.415
7	9	1	-0.759	-	-2.492	-
7	9	2	-1.01	-	-1.912	-
7	9	3	-1.278	-	-1.334	-
7	10	1	-0.72	-0.443	-0.745	-0.516
7	10	2	-0.74	-0.33	-0.627	-0.53
7	10	3	-0.583	-0.394	-0.655	-0.659
7	11	1	-0.532	-0.36	-0.59	-0.793
7	11	2	-0.365	-0.481	-0.66	-0.93
7	11	3	-0.629	-0.314	-0.789	-0.818
7	12	1	-0.581	-0.389	-0.716	-0.96
7	12	2	-0.629	-0.394	-0.75	-0.764
7	12	3	-0.884	-0.421	-0.872	-0.697
